# Supplementary material
Source: PubMed Central journal article supplement (PMC2141675)

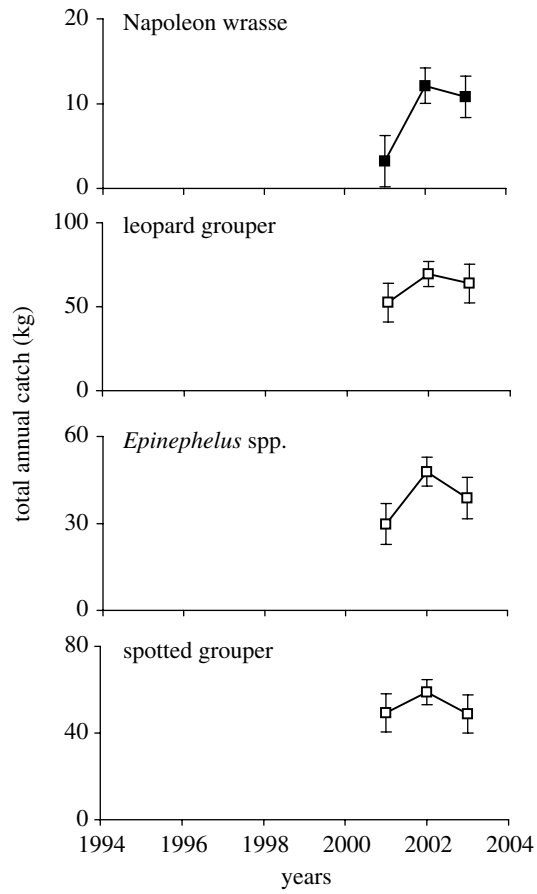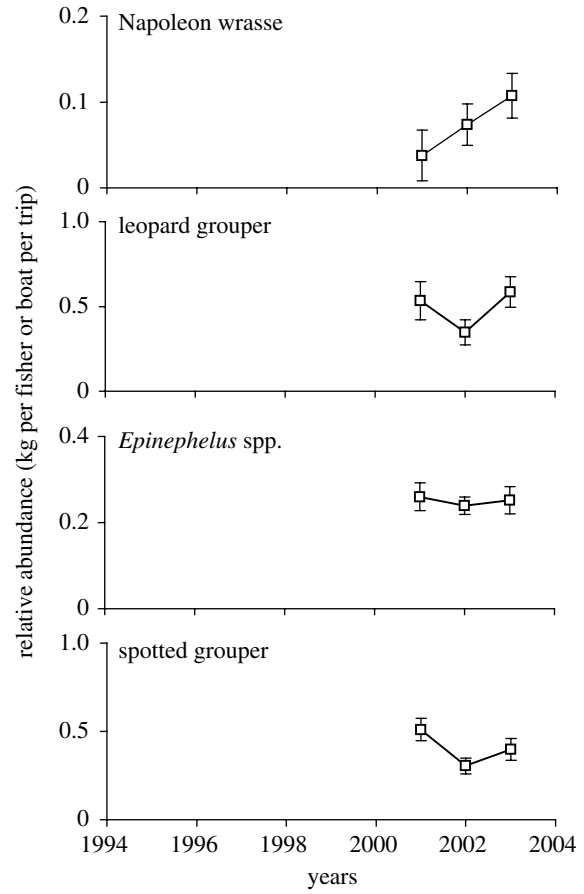

Supplement: rspb20060280s14.pdf [file rspb20060280s14.pdf]
